# Supplementary material
Source: HighWire-hosted journal article supplement (https://emj.bmj.com/content/37/1/36)
Supplement: inline-supplementary-material-3 [file inline-supplementary-material-3.pdf]

Figure S3 - TiP Score

| Criteria of the Trauma Immobilisation Patient score |                                                                                                                                                      | Score |
|-----------------------------------------------------|------------------------------------------------------------------------------------------------------------------------------------------------------|-------|
| <i>Only one item can be selected</i>                |                                                                                                                                                      |       |
| T                                                   | Leg-bone fracture (tibia and fibula)                                                                                                                 | 3     |
|                                                     | Proximal tibia fracture                                                                                                                              | 2     |
|                                                     | Ankle bi- or tri-malleolar fracture                                                                                                                  |       |
|                                                     | One leg-bone fracture (tibia or fibula)                                                                                                              |       |
|                                                     | Patellar fracture                                                                                                                                    |       |
|                                                     | Ankle or rear-foot dislocation                                                                                                                       |       |
|                                                     | Severe ankle sprain (grade 3) or knee sprain (with severe oedema or haemarthrosis)                                                                   |       |
|                                                     | Achilles tendon rupture                                                                                                                              | 1     |
|                                                     | Ankle isolated malleolar fracture                                                                                                                    |       |
|                                                     | Tarsal bone(s) or forefoot fracture                                                                                                                  |       |
|                                                     | Proximal tibiofibular, patellar, mid-foot or forefoot dislocation                                                                                    |       |
|                                                     | Moderate ankle sprain (grade 1 or 2) or knee sprain (without serious oedema or haemarthrosis)                                                        |       |
| Major muscle injury                                 |                                                                                                                                                      |       |
| <i>Only one item can be selected</i>                |                                                                                                                                                      |       |
| I                                                   | Rigid immobilisation including the knee (resin or plaster)                                                                                           | 3     |
|                                                     | Rigid below-the-knee immobilisation (resin or plaster)                                                                                               | 2     |
|                                                     | Semi-rigid immobilisation without plantar support                                                                                                    | 1     |
| <i>Multiple items can be selected</i>               |                                                                                                                                                      |       |
| P                                                   | Known major thrombophilia* or personal history of VTE †                                                                                              | 3     |
|                                                     | Age >75 y ‡                                                                                                                                          | 2     |
|                                                     | Family history of VTE (first-degree relative)                                                                                                        | 2     |
|                                                     | Active cancer or myelo-proliferative disorder                                                                                                        | 2     |
|                                                     | Surgery within past 3 months                                                                                                                         | 2     |
|                                                     | Pregnancy and Puerperium (less than 6 months)                                                                                                        | 2     |
|                                                     | Oestrogen hormone therapy (<2 y)                                                                                                                     | 2     |
|                                                     | Age >55 y and <75 y                                                                                                                                  | 1     |
|                                                     | BMI >30kg/m <sup>2</sup> §                                                                                                                           | 1     |
|                                                     | History of cancer                                                                                                                                    | 1     |
|                                                     | Chronic venous insufficiency                                                                                                                         | 1     |
|                                                     | Bedridden within past 3 months or long travel/flight (>6 hours) or unilateral or bilateral lower-extremity paralysis                                 | 1     |
|                                                     | Oestrogen hormone therapy (>2 y)                                                                                                                     | 1     |
|                                                     | Congestive heart failure NYHA >II ¶<br>or chronic respiratory failure<br>or inflammatory bowel disease<br>or chronic kidney disease (GFR<50mL/min) ¥ | 1     |

\*Known major thrombophilia: antithrombin deficiency, homozygous factor V Leiden, homozygote mutation of the prothrombin gene, multiple thrombophilia.

† Personal history of VTE: DVT or PE.

‡ y: years

§ BMI: Body Mass Index

¶ NYHA: New York Heart Association's classification of cardiovascular diseases

¥ GFR: Glomerular filtration rate

<https://doi.org/10.1371/journal.pone.0217748.t002>
